1 **Title: An optimized 16S rRNA sequencing protocol for vaginal microbiome to avoid**  
2 **biased abundance estimation**

3 **Running title:** Optimized primer for vaginal microbiome

4 **Authors:** Qiongqiong Zhang<sup>a,b</sup>, Lei Zhang<sup>a</sup>, Ying Wang<sup>b</sup>, Meng Zhao<sup>b</sup>, Rui Chen<sup>a,b</sup>, Zhi Tao<sup>a,b</sup>,  
5 Tao Lyu<sup>b</sup>, Zhenyu Huang<sup>a,b</sup>, Qiping Liao<sup>b</sup>

6 **Author Affiliations:**

7 <sup>a</sup> School of Clinical Medicine, Tsinghua University, Beijing 100084, China

8 <sup>b</sup> Department of Obstetrics and Gynecology, Beijing Tsinghua Changgung Hospital, School  
9 of Clinical Medicine, Tsinghua University, Beijing 102218, China

10 **Corresponding Author Contact Information:**

11 Qiping Liao, Department of Obstetrics and Gynecology, Beijing Tsinghua Changgung  
12 Hospital, School of Clinical Medicine, Tsinghua University, Beijing 102218, China, Tel: +  
13 86-01056118901; Fax: + 86-01056118901; E-mail: [qiping\\_liao@163.com](mailto:qiping_liao@163.com)

## 14 **Abstract**

15 We applied three 16S rRNA sequencing protocols on vaginal microbiome samples, to  
16 evaluate whether they produce unbiased estimation of vaginal microbiome composition. We  
17 modified the 27F primer (hereafter denoted as 27F'). Using vaginal samples from 28 healthy  
18 women and 10 women with bacterial vaginosis, we sequenced three 16S rRNA sequencing  
19 protocols, i.e., 27F-338R, 27F'-338R and 341F-806R protocols, naming after their PCR  
20 primer sets, to test whether the sequencing results are consistent with the clinical diagnostics,  
21 morphology and qPCR results. First, the 27F primer would not align with *Gardnerella*  
22 *vaginalis* very well, leading to poor amplification of such species. By modifying the primer  
23 sequences, the modified 27F primer (27F') was able to amplify *Gardnerella vaginalis* very  
24 well. Second, the DNA sequence of characteristic species *Lactobacillus crispatus* is identical  
25 with *Lactobacillus garrinarum*, leading to biased estimation of abundance of *Lactobacillus*  
26 *crispatus* when using V3-V4 as PCR target region; in contrast, such bias did not occur when  
27 using V1-V2 as a target region. Third, optimized 27F'-338R avoided above-mentioned biases  
28 and restored the well-established community state types (CSTs) clustering.

29

## 30 **Importance**

31 Vaginal microbiome has profound effects on the health of women and their newborns. Our  
32 study found that two well-established 16S rDNA sequencing protocols led to systematic  
33 biased estimation of characteristic species of vaginal microbiome. Subsequent analysis  
34 proved that the PCR primer fetching efficacy and target region identity were major  
35 contributor for such bias. With carefully selected target region and optimized PCR primer set,  
36 we were able to eliminate such biases and provide accurate estimation of vaginal  
37 microbiome, which showed high consistency with clinical diagnostics. We modified the 27F  
38 primer (27F'). Using the optimized PCR primer set of 27F' and 338R to target the V1-V2

39 hyper-variable region, our 16S rRNA sequencing correctly evaluate the composition of  
40 vaginal microbiome.

41

42 **KeyWords:** Bacterial vaginosis; Vaginal microbiome; Primer; 16S rRNA gene hypervariable  
43 regions.

44

## 45 **Introduction:**

46 The vaginal microbiome has been recognized as a critical factor involved in the protection of  
47 the female from various bacterial, fungal and viral pathogens.(1) Bacterial vaginosis (BV) is  
48 the most common lower reproductive tract infectious disease in reproductive age women. It is  
49 associated with a range of health issues such as pelvic inflammatory disease,(2-4)  
50 infertility,(5) preterm delivery,(6) tumors(7, 8) and sexually transmitted diseases.(9-11)  
51 Vaginitis was previously diagnosed by culturing bacteria in the vagina, which may overlook  
52 some fastidious bacteria that have not been isolated by culture.(12) Nowadays, the diagnosis  
53 of BV is typically made by Amsel criteria(13) or Nugent score.(14)

54 With the advent of high-throughput sequencing methods, more and more studies have  
55 proposed 16S rRNA sequencing to estimate the composition of vaginal microbiome.(15-17)  
56 Partial amplification of bacterial 16S gene sequences with primers across hypervariable  
57 regions, mainly including V1-V2 region(15, 18) and V3-V4 region,(17, 19, 20) is a common  
58 method to describe vaginal bacterial populations. However, it has been shown that different  
59 selection of primers for amplification can bias the results of 16S amplicons for microbiome  
60 studies.(21) For example, it has been reported that the universal bacterial 27F primer (5'-  
61 AGAGTTTGATCCTGGCTCAG-3') is not suitable for targeting vaginal bacteria in BV such  
62 as *Gardnerella vaginalis*.(22) Thus the V1-V2 region primers (27F-338R) did not efficiently  
63 evaluate the microbiome in BV.(23)

64 Based on the above research, we modified the sequence of the 27F primer (hereafter  
65 denoted as 27F'). And we sequenced three 16S rRNA sequencing protocols, i.e., 27F'-338R,  
66 27F-338R and 341F-806R protocols, naming after their PCR primer sets, to test which  
67 provides the best species-level resolution of the vaginal microbiome by means of *in silico*  
68 analysis and experimental evaluation.

69

70

## 71 **Results**

72 **27F-338R and 341F-805R 16S rRNA protocols could not estimate female vaginal**  
73 **microbiome accurately.**

74 We first checked whether the widely used 27F-338R and 341F-805R 16S rRNA protocols  
75 were capable of evaluating the vaginal microbiome from women accurately. 16S rRNA  
76 sequencing was applied on the collected vaginal swab samples from 28 healthy women and  
77 10 women with BV. As shown in **Table 1**, the top 10 bacteria that showed highest  
78 abundance across all the samples were denoted as the representative bacteria of vaginal  
79 microbiome. For each sample, any representative bacteria with abundance over 10% was  
80 denoted as a major species (highlighted in bold and italic) and others are labeled not detected  
81 (ND).

82 First, the abundance of *Gardnerella vaginalis* showed a significant difference between  
83 27F-338R and 341F-805R protocols: in the 27F-338R protocol, only 2 out of 10 BV samples  
84 (20%) showed *Gardnerella vaginalis* as a major species, while in 341F-805R protocol, 10 out  
85 of 10 BV samples (100%) showed *Gardnerella vaginalis*. *Gardnerella vaginalis* was  
86 confirmed by morphology and microscope results in all the BV samples (**Appendix Figure**  
87 **1**), thus the 341F-805R protocol is more accurate in women. What's more, with *Lactobacilli*  
88 and *Gardnerella vaginalis* specific primers, our qPCR validation from 15 random samples  
89 also supported the results of 341F-805R protocol (**Appendix Figure 2**).

90 It was also noted that another unexpected bacterium, *Lactobacillus gallinarum*, showed  
91 up as a major species in 12 out of 28 healthy samples (43%) from the 341F-805R protocol  
92 results. In contrast, no samples showed *Lactobacillus gallinarum* are from the 27F-338R  
93 protocol results. To our knowledge, unlike *Lactobacillus crispatus*, *Lactobacillus gasseri*,  
94 *Lactobacillus iners*, and *Lactobacillus jensenii*, *Lactobacillus gallinarum* is not a common

95 *Lactobacilli* in vaginal microbiome.(15) We reasoned that the differences between 16S rRNA  
96 protocol may be responsible for such controversial results regarding *Gardnerella vaginalis*  
97 and *Lactobacillus gallinarum*.

98

99 **Biased abundance estimations were caused by low fetching efficacy of primer 27F and**  
100 **identical sequences in the V3-V4 target region.**

101 We quantified the differences between the 27F-338R and 341F-805R 16S rRNA protocols by  
102 the fetching efficacy of primer set and the identity of target regions. To do so, we evaluated  
103 the alignments of primer set and target region to the reference databases. To eliminate the  
104 potential bias caused by certain reference database, we tested two databases in parallel, i.e.,  
105 SLIVA and NCBI 16S Microbioal database.

106 First, we aligned the PCR primer sequences of 27F, 338R, 341F and 805R to the  
107 reference 16S rRNA sequence databases to evaluate the primer fetching efficacy. As shown  
108 in **Figure 1A**, 27F primer could not align all of the reference sequences (88.9% in SLIVA  
109 database and 57.3% in NCBI 16S Microbioal database), compared to 100% for 338R, 341F  
110 and 805R primers (in both databases). Two species, i.e., *Gardnerella vaginalis* and  
111 *Bifidobacterium bifidum*, were found unable to align with the 27F primer. Another human  
112 vaginal microbiome characteristic species, *Atopobium vaginae*, was also found imperfect  
113 match with the 27F primer. This is consistent with a previous work that argued 27F primer  
114 could reduce PCR efficiency.(22) This also explained why the *Gardnerella vaginalis* was  
115 negligible in low abundance from the 27F-338R protocol results.

116 Second, we extracted the target regions corresponding to primer sets of 27F-338R and  
117 341F-805R (V1-V2 and V3-V4, correspondingly) and count the identical sequences shared  
118 by different species. As shown in **Figure 1B**, there were much more species that share  
119 identical sequences with others in the target region of 341F-805R protocol (1062 for SLIVA

120 database, 747 for NCBI 16S Microbioal database and 543 for intersection of the two  
121 databases) than 27F-338R protocol (36 for SLIVA database, 16 for NCBI 16S Microbioal  
122 database and 0 for intersection of the two databases). We further checked the species that  
123 share identical sequences with others, and found that *Lactobacillus crispatus* share identical  
124 sequence with *Lactobacillus gallinarum*, in the target region of 341F-805R primer set  
125 (**Figure 1C**). This explained why *Lactobacillus gallinarum* showed in high abundance from  
126 the 341F-806R protocol results.

127 To optimize the 16S rRNA protocol, we modified the sequence of 27F primer (see  
128 **Methods** for details), to allow higher PCR fetching efficacy. The modified 27F primer was  
129 denoted as 27F' and the corresponding 16S protocol was named as 27F'-338R protocol. As  
130 shown in **Figure 1A**, in the SLIVA and NCBI 16S Microbioal databases, the 27F' primer  
131 aligned 92.6% and 63.4% of reference 16S rRNA sequences, correspondingly; higher than  
132 the alignment rate of 27F (88.9% and 57.3%, correspondingly). What's more, the 27F'  
133 primer showed perfect match with *Gardnerella vaginalis*, *Bifidobacterium bifidum* and  
134 *Atopobium vaginae*. In addition, as shown in **Figure 1B**, 27F'-338R protocol showed 24, -10  
135 and 0 species that share identical sequences with others in the target region, from reference  
136 database of SLIVA, NCBI 16S Microbioal database and intersection of the two databases,  
137 correspondingly. These results indicating that our optimized 27F'-338R 16S rRNA protocol  
138 could be a better choice for human vaginal microbiome.

139

#### 140 **Optimized 27F'-338R 16S rRNA protocol provided unbiased estimation of vaginal** 141 **microbiome**

142 We further validated the 27F'-338R protocol. First, we merged all the BV samples to count  
143 the abundance of the top ten bacteria for three 16S protocols (**Figure 2A**). The top 10 species  
144 found in BV condition included *Gardnerella vaginalis*, *Prevotella* spp., *Lactobacillus iners*,

145 *Veillonellaceae* bacterium, *Sneathia amnii*, *Clostridiales* bacterium, *Atopobium vaginae*,  
146 *Chlamydia trachomatis*, *Sneathia sanguinegens* and *Candidatus saccharibacteria*. Overall,  
147 we noticed that the results from 27F'-338R and 341F-806R protocols were quite similar and  
148 the 27F-338R protocol seemed quite different. The *Gardnerella vaginalis*'s relative  
149 abundance is about 41%, 33% and 8%, when applying the 27F'-338R and 341F-806R and  
150 27F-338R protocols, respectively. This indicated that the low *Gardnerella vaginalis*  
151 estimation from 27F-338R protocol was recalibrated by the 27F'-338R protocol. Second, we  
152 merged all the healthy samples to count the abundance of top bacteria under different  
153 protocols (**Figure 2B**). Unlike the BV group, the top species were mainly *Lactobacilli*, i.e.,  
154 *Lactobacillus crispatus*, *Lactobacillus iners*, *Lactobacillus jensenii*, *Lactobacillus gasseri*,  
155 *Lactobacillus gallinarum*, *Gardnerella vaginalis*, *Prevotella* spp., *Lactobacillus helveticus*,  
156 *Lactobacillus acidophilus* and *Streptococcus anginosus*. At this time, we noticed that the  
157 27F'-338R and 27F-338R protocols were quite similar and the 341F-806R protocol seemed  
158 quite different from others. The emerging of in-relevant *Lactobacillus* spp., i.e, *Lactobacillus*  
159 *gallinarum*, *Lactobacillus helveticus* and *Lactobacillus acidophilus* in the 341F-806 protocol  
160 is because of misalignment due to the identical sequence in the target region. In conclusion,  
161 we showed that the 27F'-338R protocol could recalibrate the biased estimation of  
162 *Gardnerella vaginalis* and *Lactobacillus crispatus*.

163 Subsequently, we found the 27F'-338R protocol could restore the well-established  
164 community state types (CSTs) clustering.(15) We performed unsupervised clustering of 28  
165 healthy and 10 BV samples using the abundance of the top 20 bacteria (**Figure 3**). We  
166 noticed all the healthy samples were clustered together and all the BV samples were clustered  
167 together. All the BV samples showed *Lactobacillus* diminished and *Gardnerella vaginalis*  
168 dominated diverse community, similar to the CST-IV cluster.(15) For the healthy samples,  
169 we noticed all *Lactobacillus crispatus* enriched samples were clustered together, so were the



170 *Lactobacillus gasseri* enriched samples, the *Lactobacillus iners* enriched samples and the  
171 *Lactobacillus iners* enriched samples; and they formed the CST-I, CST-II, CST-III and CST-  
172 V cluster.(15) In summary, we propose that the 27F'-338R protocol based 16S rRNA  
173 sequencing method could give an unbiased estimation of vaginal microbiome.

174

## 175 **Discussion**

176 16S rRNA sequencing has been used to identify the bacterial composition of the human  
177 vaginal microbiome in multiple ethnic groups, but the study on the population's vaginal  
178 microbiome is still insufficient. In addition, no studies have examined whether different 16S  
179 rRNA sequencing protocols are an unbiased way to identify vaginal microbes. Our principal  
180 findings were that the 27F primer was not well aligned with *Gardnerella vaginalis*, resulting  
181 in poor amplification effect. By modifying the 27F primer, 27F' could well amplify  
182 *Gardnerella vaginalis*; The DNA sequence of *Lactobacillus crispatus* was the same as that of  
183 *Lactobacillus garrinarum*. There was a bias in the estimation of *Lactobacillus crispatus*  
184 abundance when V3-V4 was the target region of PCR, while there was no such bias when  
185 V1-V2 was the target region; The optimized 27F '-338R avoids the above deviation and  
186 restores the well-established community state types (CSTs) clustering.

187 As we showed in the introduction section, a series of 16S rRNA sequencing protocols  
188 with different target regions and corresponded primer sets were utilized in vaginal  
189 microbiome studies. However, due to the limit on reads length, only a subset of target regions  
190 remains available. One recent study had performed in-silico and experimental evaluations on  
191 primer sets of V1-V3, V3-V4 and V4. In their conclusion, V4 region provides the best results  
192 on species level resolution of the vaginal microbiome.(21) In our evaluation, we emphasized  
193 the consistency between the 16S rRNA sequencing results and clinical diagnosis, such as  
194 morphology and culture of the characteristic species. Another study compared two 16S rRNA

195 protocols, utilizing V1-V2 and V3-V4 hypervariable regions as target regions. They found  
196 16S rRNA sequencing protocol utilizing V3-V4 hypervariable region would identified more  
197 species and the ones using V1-V2 hypervariable region would miss several characteristic  
198 speices of vaginal microbiome.(23) We agreed with them that unoptimized 16S rRNA  
199 sequencing protocol utilizing V1-V2 hypervariable region would produce biased estimation.

200 *Gardnerella vaginalis* is a well recognized bacteria, which is confirmed by  
201 morphology and microscope results in all the BV samples. However, through our *in-silico*  
202 analysis, *Gardnerella vaginalis* were found unable to align with the 27F primer. This is  
203 consistent with previous reports as the 27F primer could not match the *Gardnerella vaginalis*  
204 very well, leading to a low PCR efficiency.<sup>22</sup> For other microbiome, if we normalized the  
205 *Gardnerella vaginalis*'s abundance, they showed no significant difference under the 27F'-  
206 338R and 341F-806R and 27F-338R protocols.

207 *Lactobacillus* spp. are so important in human vaginal microbiome that four  
208 *Lactobacillus* spp. were the characteristic species used by the authoritative five community  
209 state types (CSTs), which are established to group vaginal microbiome patterns according to  
210 the dominant species present: CSTI, II, III, IV and V dominated by *L.crispatus*, *L. gasseri*, *L.*  
211 *iners*, diverse community and *L. jensenii*, respectively.(15) However, we found that  
212 *Lactobacillus crispatus* share identical sequence with *Lactobacillus gallinarum* when using  
213 the target region of 341F-805R primer set. That is, if we used the V3-V4 as the target region,  
214 we might wrongly assign the characteristic species of CST-I (*Lactobacillus crispatus*) to  
215 another vaginal microbiome in-relevant species (*Lactobacillus gallinarum*).

216 As shown in our trial experiments, the 27F-338R protocol under-estimated the  
217 abundance of *Gardnerella vaginalis*. In addition, we showed that 16S rRNA sequencing  
218 protocol utilizing V3-V4 hypervariable region would also introduce bias: the 341F-806R  
219 protocol misaligned *Lactobacillus crisptus* to other in-relevant *Lactobacilli*. What's more,

220 these biases only occurs in its own protocol, but could not be repeated in the other protocol.  
221 Therefore, we reasoned that such bias was not sample or ethnic group related, but instead,  
222 associated with unoptimized 16S rRNA sequencing protocols. We have pinned down that  
223 primer sequence and target region are the major contributor for the bias. Subsequently, we  
224 have optimized the protocol, using the modified 27F primer and chose the V1-V2 hyper-  
225 variable region as the target region. The optimized 16S rRNA sequencing protocol had been  
226 proven to be able to recalibrate the estimation of *Gardnerella vaginalis*, preventing  
227 misalignment of *Lactobacillus crispatus* and restored the authoritative five community state  
228 types (CSTs).

229 This study provides an optimized 16S rRNA-based protocol for evaluating the  
230 composition of human vaginal microbiome using current common NGS sequencing platform.  
231 and it is the first piece of work that systematically investigated the female vaginal  
232 microbiome with above-mentioned methods. This optimized 16S rRNA-based protocol can  
233 not only accurately assess the composition of vaginal flora, but also accurately and  
234 economically. The accurate assessment of vaginal microbiome could contribute to the  
235 treatment of vaginitis in hospital.

236 Serval further works will be updated regard the following aspects. In this study, we  
237 used BV sample and healthy samples, because the vaginal microbiome is mainly dominated  
238 by bacteria in these two groups. Another bacterium dominate disease, aerobic vaginitis, will  
239 be tested in our subsequent work. Yet, one disadvantage of the 16S rRNA sequencing was  
240 exposed, as well and that is that the 16S rRNA sequencing is not suitable for the diagnosis of  
241 TV, VVC, HPV, HIV and so on. Currently, we used the clinical diagnostics such as such as  
242 morphology and culture of the characteristic species as ground truth of human vaginal  
243 microbiome's composition. However, the composition of human vaginal microbiome is  
244 constantly being updated as more and more new technologies are being applied, such as

245 metagenome related technology. It should also be noted, that as we were restricted by the  
246 sequencing platform, we only tested the target regions of the V1-V2 and V3-V4, leaving the  
247 V1-V3, V4, V4-V6 target regions unexamined, albeit future work will examine such target  
248 regions not included in the present study.

249

## 250 **Materials and methods**

### 251 **27F' primer design**

252 As mentioned above, the common nondegenerate form of the 27F primer (5'-  
253 AGAGTTTGATCCTGGCTCAG-3') is not suitable for targeting *Gardnerella vaginalis* in  
254 BV.(22) Meanwhile, the sequence (5'-AGGGTTCGATTCTGGCTCAG-3') most frequently  
255 observed binding site sequence is found in *Bifidobacteriales*, including the genus  
256 *Gardnerella* (GenBank accession numbers M58729 to M58744).(22, 24) Its binding site  
257 variant is of particular interest to the study of vaginal microbiology in BV, and the sequence  
258 has three mismatched bases compared to the common sequence of the 27F primer. To  
259 combine two sequences' strengths, we merged their different bases (R=A/G,Y=T/C), and got  
260 an modified 27F primer, i.e., 27F' (5'-AGRGTTYGATYCTGGCTCAG-3').

261

### 262 **Study Population:**

263 28 healthy women without vaginitis such as aerobic vaginitis (AV), bacterial vaginosis (BV),  
264 vulvovaginal candidiasis (VVC), and trichomonas vaginitis (TV), and 10 women with BV  
265 only were enrolled at the gynecological clinic of Beijing Tsinghua Changgung Hospital from  
266 April to October 2018. All women were aging between 18 and 50 years old and were not  
267 pregnant or breast-feeding. The protocol was approved by the Medical Ethics Committee of  
268 Beijing Tsinghua Changgung Hospital. Written informed consents were obtained from each  
269 participant.

270

## 271 **Sample collection and DNA Extraction**

272 The vaginal secretions were obtained via two swabs. One swab was used to prepare a dry  
273 slide for Gram staining, under 400× magnification for visual detection, to test for AV, BV,  
274 VVC, and TV. The criteria of Donders(25) et al. was used to diagnose AV (with a score of 3  
275 or greater). BV was determined by Nugent's criteria (Nugent score of 7 or greater).(14) The  
276 diagnosis of VVC and TV was mainly based on morphological observation under high power  
277 field (400× magnification). The other swab was quickly plunged into a tube containing 1 ml  
278 PBS solution and stored at -80°C until total DNA extraction of vaginal flora. The DNA of the  
279 sample was extracted through the TIANamp Bacteria DNA Kit (TIANGEN, China)  
280 according to the manufacturer's instructions. This step required additional Lysozyme (Sigma–  
281 Aldrich), proteinase K, RNase A (Sigma–Aldrich), and finally washed and stored the DNA  
282 with 1×TE buffer. A spectrophotometer was used (Thermo Scientific NanoDrop One) to  
283 measure the concentration and purity of the DNA extracts. Then isolated DNA was stored at -  
284 20°C until needed.

285

## 286 **Sequencing**

287 Taking data volume, sequencing accuracy, read length and economic factors into account, in  
288 this study, we chose the pair-end Illumina Solexa sequencing platform over 454  
289 pyrosequencing platform. The V1-V2 and V3-V4 regions of the 16S rRNA were then  
290 separately amplified with universal primers 27F (5'-AGAGTTTGATCCTGGCTCAG-3')  
291 and 338R (5'-GCTGCCTCCCGTAGGAGT-3'), 341F (5'-CCTAYGGGRBGCASCAG-3')  
292 and 806R (5'-GGACTACNNGGGTATCTAAT-3'). The V1-V2 regions were also amplified  
293 with our modified primers 27F' (5'-AGRGTTYGATYCTGGCTCAG-3') and 338R (5'-  
294 GCTGCCTCCCGTAGGAGT-3'). All PCR reactions were carried out with Phusion® High-

295 Fidelity PCR MasterMix (New England Biolabs). The PCR products examined with 400-  
296 450bp were chosen and mixed in equal density ratios. Then, the mixture PCR product was  
297 purified with Qiagen Gel Extraction Kit (Qiagen, Germany). Sequencing libraries were  
298 generated using a TruSeq® DNA PCR-Free Sample Preparation Kit (Illumina, USA)  
299 following the manufacturer's recommendations and index codes were added. The library  
300 quality was assessed on the Qubit® 2.0Fluorometer (Thermo Scientific) and Agilent  
301 Bioanalyzer 2100 system. At last, the library was sequenced on an Illumina HiSeq 2500  
302 platform and 250 bp paired-end reads were generated.

303

### 304 **Reference Database**

305 We compared SLIVA and NCBI in the following evaluations, as the Green genes database  
306 has not been updated since 2013(26) and RDP database is semi-automatic curated.(27) For  
307 the SLIVA database, we used and downloaded the SSU 128 Ref NR 99 version from  
308 <https://www.arb-silva.de>. For the NCBI database, we downloaded using the blast command  
309 of blastdbcmd in June 2017. All the taxonomies are summarized into species level.

310

### 311 **Sequencing Data Processing**

312 Paired-end reads were assigned to samples according to the sample-specific barcode and  
313 truncated by cutting off the barcode and primer sequence. Use the software  
314 FLASH(V1.2.7)(28) to merge paired-end reads. According to the QIIME(V1.7.0)(29) quality  
315 control process, the raw tags were mass filtered under specific filtration conditions to obtain  
316 high quality clean tags.(30)

317 The 16S sequence reference index was built using the command “bowtie2-build”,  
318 with default parameters. All reads were aligned against the prebuild index using bowtie2,  
319 with parameter of “bowtie2 --local”. Alignments were associated to taxonomy by a sequence-

320 id-to-taxonomy map, provided by the reference database, using a custom Perl script. Unique  
321 reads were counted for each taxonomy and abundance was calculated for all taxonomy.  
322 Species with abundance lower than 1% or reads number less than 5 were excluded.

323

#### 324 **qPCR validation**

325 *Lactobacilli* and *Gardnerella vaginalis* specific qPCR primer and probe sequences were  
326 synthesized as previously described.(31) DNA was amplified using SGEExcel GoldStar  
327 TaqMan qPCR Mix (Sangon Biotech) on a Bio-Rad CFX96 real-time PCR detection system.

328

#### 329 **Acknowledgments**

330 We would like to thank the National Natural Science Foundation of China (Grant  
331 No.81671409) and Beijing Municipal Administration of Hospitals Clinical Medicine  
332 Development of Special Funding (Grant No. XMLX201605) to support this work, and thank  
333 Dr. Hu for kind help to this article and the nurses in the outpatient department of obstetrics  
334 and gynaecology of Beijing Tsinghua Changgung Hospital for their help in the specimen  
335 collection process.

336

## 337 **References**

- 338 1. **Garcia-Velasco JA, Menabrito M, Catalan IB.** 2017. What fertility specialists should  
339 know about the vaginal microbiome: a review. *Reprod Biomed Online* **35**:103-112.
- 340 2. **Soper DE, Brockwell NJ, Dalton HP, Johnson D.** 1994. Observations concerning the  
341 microbial etiology of acute salpingitis. *Am J Obstet Gynecol* **170**:1008-1014;  
342 discussion 1014-1007.
- 343 3. **Taylor BD, Darville T, Haggerty CL.** 2013. Does bacterial vaginosis cause pelvic  
344 inflammatory disease? *Sex Transm Dis* **40**:117-122.
- 345 4. **Haggerty CL, Hillier SL, Bass DC, Ness RB, Evaluation PID, Clinical Health study i.**  
346 2004. Bacterial vaginosis and anaerobic bacteria are associated with endometritis.  
347 *Clin Infect Dis* **39**:990-995.
- 348 5. **Van Oostrum N, De Sutter P, Meys J, Verstraelen H.** 2013. Risks associated with  
349 bacterial vaginosis in infertility patients: a systematic review and meta-analysis. *Hum*  
350 *Reprod* **28**:1809-1815.
- 351 6. **Klebanoff MA, Brotman RM.** 2018. Treatment of bacterial vaginosis to prevent  
352 preterm birth. *Lancet* **392**:2141-2142.
- 353 7. **Kero K, Rautava J, Syrjanen K, Grenman S, Syrjanen S.** 2017. Association of  
354 asymptomatic bacterial vaginosis with persistence of female genital human  
355 papillomavirus infection. *Eur J Clin Microbiol Infect Dis* **36**:2215-2219.
- 356 8. **Sodhani P, Gupta S, Gupta R, Mehrotra R.** 2017. Bacterial vaginosis and cervical  
357 intraepithelial neoplasia: is there an association or is co-existence incidental? *Asian*  
358 *Pac J Cancer Prev* **18**:1289-1292.
- 359 9. **Esber A, Vicetti Miguel RD, Cherpes TL, Klebanoff MA, Gallo MF, Turner AN.** 2015.  
360 Risk of Bacterial Vaginosis Among Women With Herpes Simplex Virus Type 2  
361 Infection: A Systematic Review and Meta-analysis. *J Infect Dis* **212**:8-17.
- 362 10. **Gillet E, Meys JF, Verstraelen H, Bosire C, De Sutter P, Temmerman M, Broeck DV.**  
363 2011. Bacterial vaginosis is associated with uterine cervical human papillomavirus  
364 infection: a meta-analysis. *BMC Infect Dis* **11**:10.
- 365 11. **Atashili J, Poole C, Ndumbe PM, Adimora AA, Smith JS.** 2008. Bacterial vaginosis  
366 and HIV acquisition: a meta-analysis of published studies. *AIDS* **22**:1493-1501.
- 367 12. **Relman DA.** 2002. New technologies, human-microbe interactions, and the search  
368 for previously unrecognized pathogens. *J Infect Dis* **186 Suppl 2**:S254-258.
- 369 13. **Amsel R, Totten PA, Spiegel CA, Chen KC, Eschenbach D, Holmes KK.** 1983.  
370 Nonspecific vaginitis. Diagnostic criteria and microbial and epidemiologic  
371 associations. *Am J Med* **74**:14-22.
- 372 14. **Nugent RP, Krohn MA, Hillier SL.** 1991. Reliability of diagnosing bacterial vaginosis is  
373 improved by a standardized method of gram stain interpretation. *J Clin Microbiol*  
374 **29**:297-301.
- 375 15. **Ravel J, Gajer P, Abdo Z, Schneider GM, Koenig SS, McCulle SL, Karlebach S, Gorle R,**  
376 **Russell J, Tacket CO, Brotman RM, Davis CC, Ault K, Peralta L, Forney LJ.** 2011.  
377 Vaginal microbiome of reproductive-age women. *Proc Natl Acad Sci U S A* **108 Suppl**  
378 **1**:4680-4687.
- 379 16. **Ravel J, Brotman RM, Gajer P, Ma B, Nandy M, Fadrosh DW, Sakamoto J, Koenig SS,**  
380 **Fu L, Zhou X, Hickey RJ, Schwebke JR, Forney LJ.** 2013. Daily temporal dynamics of



- 381 vaginal microbiota before, during and after episodes of bacterial vaginosis.  
382 *Microbiome* **1**:29.
- 383 17. **Tamarelle J, de Barbeyrac B, Le Hen I, Thiebaut A, Bebear C, Ravel J, Delarocque-**  
384 **Astagneau E.** 2018. Vaginal microbiota composition and association with prevalent  
385 *Chlamydia trachomatis* infection: a cross-sectional study of young women attending  
386 a STI clinic in France. *Sex Transm Infect* **94**:616-618.
- 387 18. **Gajer P, Brotman RM, Bai G, Sakamoto J, Schutte UM, Zhong X, Koenig SS, Fu L, Ma**  
388 **ZS, Zhou X, Abdo Z, Forney LJ, Ravel J.** 2012. Temporal dynamics of the human  
389 vaginal microbiota. *Sci Transl Med* **4**:132ra152.
- 390 19. **Srinivasan S, Hoffman NG, Morgan MT, Matsen FA, Fiedler TL, Hall RW, Ross FJ,**  
391 **McCoy CO, Bumgarner R, MARRAZZO JM, Fredricks DN.** 2012. Bacterial communities  
392 in women with bacterial vaginosis: high resolution phylogenetic analyses reveal  
393 relationships of microbiota to clinical criteria. *PLoS One* **7**:e37818.
- 394 20. **Fadrosh DW, Ma B, Gajer P, Sengamalay N, Ott S, Brotman RM, Ravel J.** 2014. An  
395 improved dual-indexing approach for multiplexed 16S rRNA gene sequencing on the  
396 Illumina MiSeq platform. *Microbiome* **2**:6.
- 397 21. **Van Der Pol WJ, Kumar R, Morrow CD, Blanchard EE, Taylor CM, Martin DH,**  
398 **Lefkowitz EJ, Muzny CA.** 2019. In Silico and Experimental Evaluation of Primer Sets  
399 for Species-Level Resolution of the Vaginal Microbiota Using 16S Ribosomal RNA  
400 Gene Sequencing. *J Infect Dis* **219**:305-314.
- 401 22. **Frank JA, Reich CI, Sharma S, Weisbaum JS, Wilson BA, Olsen GJ.** 2008. Critical  
402 evaluation of two primers commonly used for amplification of bacterial 16S rRNA  
403 genes. *Appl Environ Microbiol* **74**:2461-2470.
- 404 23. **Graspeuntner S, Loeper N, Kunzel S, Baines JF, Rupp J.** 2018. Selection of validated  
405 hypervariable regions is crucial in 16S-based microbiota studies of the female genital  
406 tract. *Sci Rep* **8**:9678.
- 407 24. **Leblond-Bourget N, Philippe H, Mangin I, Decaris B.** 1996. 16S rRNA and 16S to 23S  
408 internal transcribed spacer sequence analyses reveal inter- and intraspecific  
409 *Bifidobacterium* phylogeny. *Int J Syst Bacteriol* **46**:102-111.
- 410 25. **Donders GG, Vereecken A, Bosmans E, Dekeersmaecker A, Salembier G, Spitz B.**  
411 2002. Definition of a type of abnormal vaginal flora that is distinct from bacterial  
412 vaginosis: aerobic vaginitis. *BJOG* **109**:34-43.
- 413 26. **Park SC, Won S.** 2018. Evaluation of 16S rRNA Databases for Taxonomic Assignments  
414 Using Mock Community. *Genomics Inform* **16**:e24.
- 415 27. **Balvociute M, Huson DH.** 2017. SILVA, RDP, Greengenes, NCBI and OTT - how do  
416 these taxonomies compare? *BMC Genomics* **18**:114.
- 417 28. **Magoc T, Salzberg SL.** 2011. FLASH: fast length adjustment of short reads to improve  
418 genome assemblies. *Bioinformatics* **27**:2957-2963.
- 419 29. **Caporaso JG, Kuczynski J, Stombaugh J, Bittinger K, Bushman FD, Costello EK, Fierer**  
420 **N, Pena AG, Goodrich JK, Gordon JI, Huttley GA, Kelley ST, Knights D, Koenig JE, Ley**  
421 **RE, Lozupone CA, McDonald D, Muegge BD, Pirrung M, Reeder J, Sevinsky JR,**  
422 **Turnbaugh PJ, Walters WA, Widmann J, Yatsunencko T, Zaneveld J, Knight R.** 2010.  
423 QIIME allows analysis of high-throughput community sequencing data. *Nat Methods*  
424 **7**:335-336.
- 425 30. **Bokulich NA, Subramanian S, Faith JJ, Gevers D, Gordon JI, Knight R, Mills DA,**  
426 **Caporaso JG.** 2013. Quality-filtering vastly improves diversity estimates from  
427 Illumina amplicon sequencing. *Nat Methods* **10**:57-59.

- 428 31. **Menard JP, Fenollar F, Henry M, Bretelle F, Raoult D.** 2008. Molecular quantification  
429 of *Gardnerella vaginalis* and *Atopobium vaginae* loads to predict bacterial vaginosis.  
430 *Clin Infect Dis* **47**:33-43.  
431

## 433 **Figure Legends**

434 **Figure 1:** PCR primer fetching efficacy and target region identity quantification.

435 A. Primer efficiency were quantified by the alignment of primer sequence to the reference  
436 sequences. In X-axis, two reference databases were used, SLIVA and NCBI 16S  
437 Microbioal. The Y-axis showed the percentage of aligned reference sequences by certain  
438 primer sequences, including 27F' (blue), 27F (orange), 338R (grey), 341F (yellow) and  
439 805R (dark blue).

440 B. Number of identical sequences shared by two different species had been shown in bar  
441 plot. The X-axis represents the reference database we used.

442 C. Alignment of *Lactobacillus crispatus* and *Lactobacillus gallinarum* at V3-V4 region.

443

444 **Figure 2:** Comparison of 16S rRNA sequencing results from 27F-338R, 27F'-338R and  
445 341F-806R protocols.

446 A. The top ten bacteria's abundance were from the BV group. Three protocols were  
447 compared, i.e., 27F-338R (blue), 27F'-338R (orange) and 341F-806R (grey).

448 B. Like in A, the top ten bacteria showed in the healthy group from three protocols, i.e., 27F-  
449 338R (blue), 27F'-338R (orange) and 341F-806R (grey), were compared.

450

451 **Figure 3:** Heatmap and dendrogram of vaginal compositions from 28 healthy and 10 BV  
452 samples.

453 The vaginal compositions from 28 healthy and 10 BV samples utilizing 27F'-338R protocol  
454 were clustered and colored by relative abundance (from low to high abundance, color  
455 changes from green to red).

456

457 **Appendix Figure 1:** Morphology of samples under 400× magnification after gram staining.

458 A: 28 normal samples, B: 10 BV samples.

459

460 **Appendix Figure 2:** qPCR validation of the existence of *Lactobacilli* and *Gardnerella*

461 *vaginalis*.

462 10 vaginal microbiome samples from healthy women (highlighted in blue) and 5 from

463 women with BV (highlighted in orange) were sampled and used to perform qPCR validation.

464 The difference between the C<sub>q</sub> values of *Lactobacilli* and *Gardnerella vaginalis* was used.

465

466



| Sample ID | <i>L. crispatus</i> |            | <i>L. iners</i> |            | <i>L. jensenii</i> |            | <i>L. gasseri</i> |           | <i>L. gallinarum</i> |            | <i>P. spp</i> |            | <i>G. vaginalis</i> |            | <i>A. vaginae</i> |            | <i>V. bacterium</i> |            | <i>S. amnii</i> |            |
|-----------|---------------------|------------|-----------------|------------|--------------------|------------|-------------------|-----------|----------------------|------------|---------------|------------|---------------------|------------|-------------------|------------|---------------------|------------|-----------------|------------|
|           | 27F-338R            | 341F-806R  | 27F-338R        | 341F-806R  | 27F-338R           | 341F-806R  | 27F-338R          | 341F-806R | 27F-338R             | 341F-806R  | 27F-338R      | 341F-806R  | 27F-338R            | 341F-806R  | 27F-338R          | 341F-806R  | 27F-338R            | 341F-806R  | 27F-338R        | 341F-806R  |
| 21        | <b>94%</b>          | <b>76%</b> | ND              | ND         | ND                 | ND         | ND                | ND        | ND                   | <b>13%</b> | ND            | ND         | ND                  | ND         | ND                | ND         | ND                  | ND         | ND              | ND         |
| 22        | ND                  | ND         | ND              | ND         | <b>93%</b>         | <b>90%</b> | ND                | ND        | ND                   | ND         | ND            | ND         | ND                  | ND         | ND                | ND         | ND                  | ND         | ND              | ND         |
| 23        | <b>33%</b>          | <b>27%</b> | <b>65%</b>      | <b>65%</b> | ND                 | ND         | ND                | ND        | ND                   | ND         | ND            | ND         | ND                  | ND         | ND                | ND         | ND                  | ND         | ND              | ND         |
| 24        | <b>33%</b>          | <b>31%</b> | <b>64%</b>      | <b>59%</b> | ND                 | ND         | ND                | ND        | ND                   | ND         | ND            | ND         | ND                  | ND         | ND                | ND         | ND                  | ND         | ND              | ND         |
| 25        | <b>27%</b>          | <b>20%</b> | <b>68%</b>      | <b>55%</b> | ND                 | ND         | ND                | ND        | ND                   | ND         | ND            | ND         | ND                  | <b>11%</b> | ND                | ND         | ND                  | ND         | ND              | ND         |
| 26        | ND                  | ND         | <b>96%</b>      | <b>90%</b> | ND                 | ND         | ND                | ND        | ND                   | ND         | ND            | ND         | ND                  | ND         | ND                | ND         | ND                  | ND         | ND              | ND         |
| 27        | ND                  | ND         | ND              | <b>12%</b> | <b>87%</b>         | <b>43%</b> | ND                | ND        | ND                   | ND         | ND            | ND         | ND                  | <b>40%</b> | ND                | ND         | ND                  | ND         | ND              | ND         |
| 28        | <b>93%</b>          | <b>68%</b> | ND              | ND         | ND                 | ND         | ND                | ND        | ND                   | <b>12%</b> | ND            | ND         | ND                  | ND         | ND                | ND         | ND                  | ND         | ND              | ND         |
| BV1       | ND                  | ND         | ND              | ND         | ND                 | ND         | ND                | ND        | ND                   | ND         | <b>27%</b>    | <b>24%</b> | ND                  | <b>36%</b> | <b>20%</b>        | <b>10%</b> | <b>14%</b>          | <b>11%</b> | ND              | ND         |
| BV2       | ND                  | ND         | ND              | ND         | ND                 | ND         | ND                | ND        | ND                   | ND         | <b>26%</b>    | <b>25%</b> | ND                  | <b>31%</b> | <b>29%</b>        | <b>19%</b> | <b>17%</b>          | <b>14%</b> | ND              | ND         |
| BV6       | ND                  | ND         | ND              | ND         | ND                 | ND         | ND                | ND        | ND                   | ND         | <b>22%</b>    | <b>16%</b> | ND                  | <b>20%</b> | ND                | ND         | <b>11%</b>          | ND         | <b>50%</b>      | <b>45%</b> |
| BV3       | ND                  | ND         | ND              | <b>17%</b> | ND                 | ND         | ND                | ND        | ND                   | ND         | <b>30%</b>    | <b>17%</b> | ND                  | <b>25%</b> | <b>13%</b>        | ND         | <b>13%</b>          | ND         | ND              | ND         |
| BV7       | ND                  | ND         | <b>13%</b>      | ND         | ND                 | ND         | ND                | ND        | ND                   | ND         | <b>22%</b>    | <b>19%</b> | ND                  | <b>37%</b> | <b>14%</b>        | ND         | <b>21%</b>          | <b>15%</b> | ND              | ND         |
| BV8       | ND                  | ND         | <b>26%</b>      | <b>23%</b> | ND                 | ND         | ND                | ND        | ND                   | ND         | <b>17%</b>    | <b>16%</b> | ND                  | <b>30%</b> | ND                | ND         | <b>20%</b>          | <b>17%</b> | ND              | ND         |
| BV4       | ND                  | ND         | <b>60%</b>      | <b>45%</b> | ND                 | ND         | ND                | ND        | ND                   | ND         | ND            | ND         | ND                  | <b>29%</b> | ND                | ND         | ND                  | ND         | ND              | ND         |
| BV5       | ND                  | ND         | <b>41%</b>      | <b>21%</b> | ND                 | ND         | ND                | ND        | ND                   | ND         | <b>22%</b>    | ND         | <b>16%</b>          | <b>49%</b> | ND                | ND         | ND                  | ND         | ND              | ND         |
| BV9       | ND                  | ND         | ND              | ND         | ND                 | ND         | ND                | ND        | ND                   | ND         | <b>42%</b>    | <b>25%</b> | <b>11%</b>          | <b>44%</b> | ND                | ND         | ND                  | ND         | <b>40%</b>      | <b>24%</b> |
| BV10      | ND                  | ND         | ND              | ND         | ND                 | ND         | ND                | ND        | ND                   | ND         | <b>29%</b>    | <b>28%</b> | ND                  | <b>38%</b> | <b>24%</b>        | <b>12%</b> | <b>18%</b>          | <b>14%</b> | ND              | ND         |

Abbreviation: BV, bacterial vaginosis. ND, not detected.

Each row represents a sample ID and each column represents the corresponding relative abundance of a species under a 16S rDNA sequencing protocol. Only the top 10 bacteria that showed highest abundance across all the samples were shown. Abundance higher than 10% is highlighted with italic and bold font, and others are labeled ND.



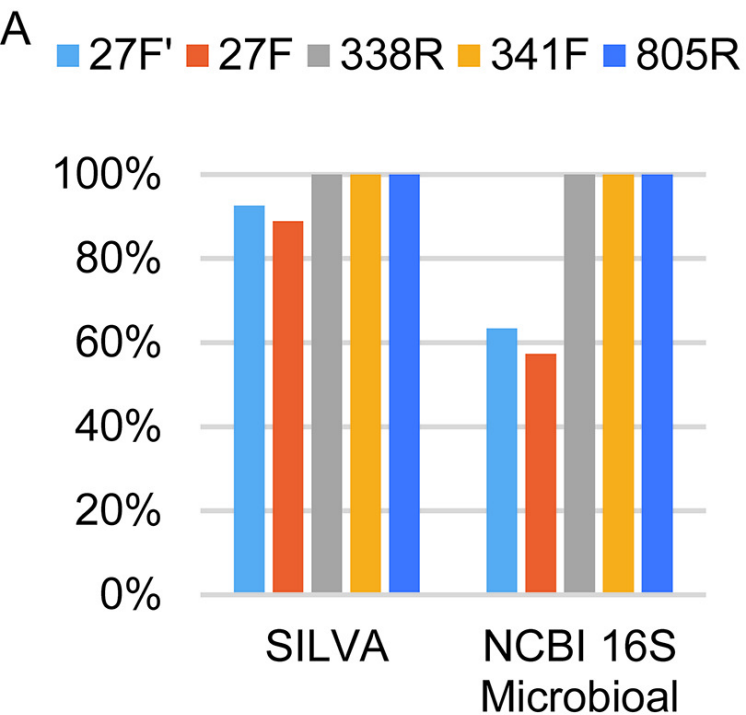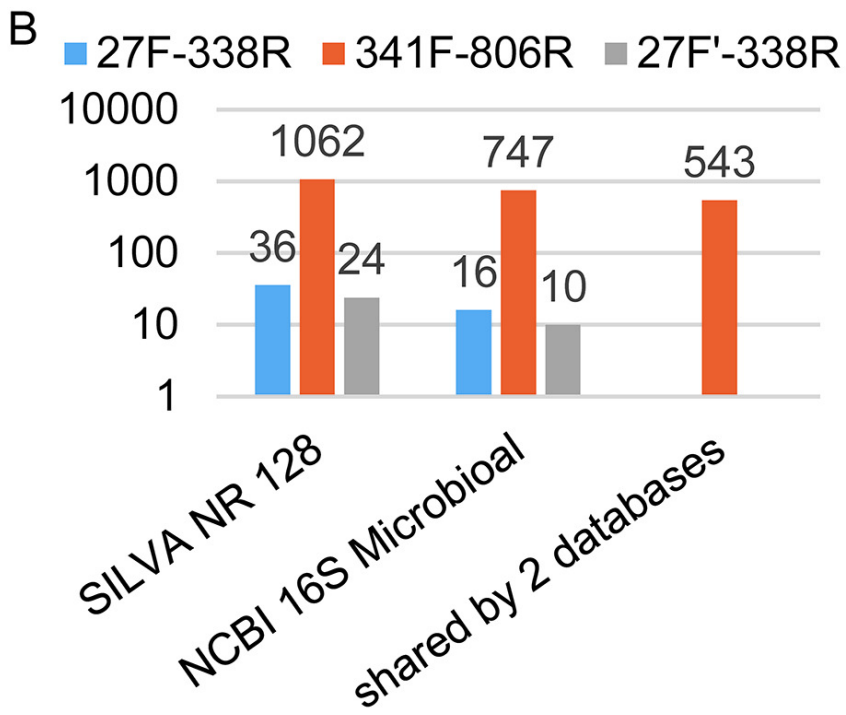

**C**

```

Seq_1 1 TAGGGAATCTTCCACAATGGACGCAAGTCTGATGGAGCAACGCCGCGTGAGTGAAGAAGG 60
Seq_2 1 TAGGGAATCTTCCACAATGGACGCAAGTCTGATGGAGCAACGCCGCGTGAGTGAAGAAGG 60

Seq_1 61 TTTTCGGATCGTAAAGCTCTGTTGTTGGTGAAGAAGGATAGAGGTAGTAACTGGCCTTTA 120
Seq_2 61 TTTTCGGATCGTAAAGCTCTGTTGTTGGTGAAGAAGGATAGAGGTAGTAACTGGCCTTTA 120

Seq_1 121 TTTGACGGTAATCAACCAGAAAGTCACGGCTAACTACGTGCCAGCAGCCGCGGTAATACG 180
Seq_2 121 TTTGACGGTAATCAACCAGAAAGTCACGGCTAACTACGTGCCAGCAGCCGCGGTAATACG 180

Seq_1 181 TAGGTGGCAAGCGTTGTCCGGATTTATTGGGCGTAAAGCGAGCGCAGGCCGGAAGAATAAG 240
Seq_2 181 TAGGTGGCAAGCGTTGTCCGGATTTATTGGGCGTAAAGCGAGCGCAGGCCGGAAGAATAAG 240

Seq_1 241 TCTGATGTGAAAGCCCTCGGCTTAACCGAGGAACTGCATCGGAAACTGTTTTTCTTGAGT 300
Seq_2 241 TCTGATGTGAAAGCCCTCGGCTTAACCGAGGAACTGCATCGGAAACTGTTTTTCTTGAGT 300

Seq_1 301 GCAGAAGAGGAGAGTGGAACTCCATGTGTAGCAGGTGGAATGCGTAGATATATGGAAGAAC 360
Seq_2 301 GCAGAAGAGGAGAGTGGAACTCCATGTGTAGCAGGTGGAATGCGTAGATATATGGAAGAAC 360

Seq_1 361 ACCAGTGGCGAAGGCCGGCTCTCTGGTCTGCAACTGACGCTGAGGCTCGAAAGCATGGGTA 420
Seq_2 361 ACCAGTGGCGAAGGCCGGCTCTCTGGTCTGCAACTGACGCTGAGGCTCGAAAGCATGGGTA 420

Seq_1 421 GCGAACAG 428
Seq_2 421 GCGAACAG 428

```



A

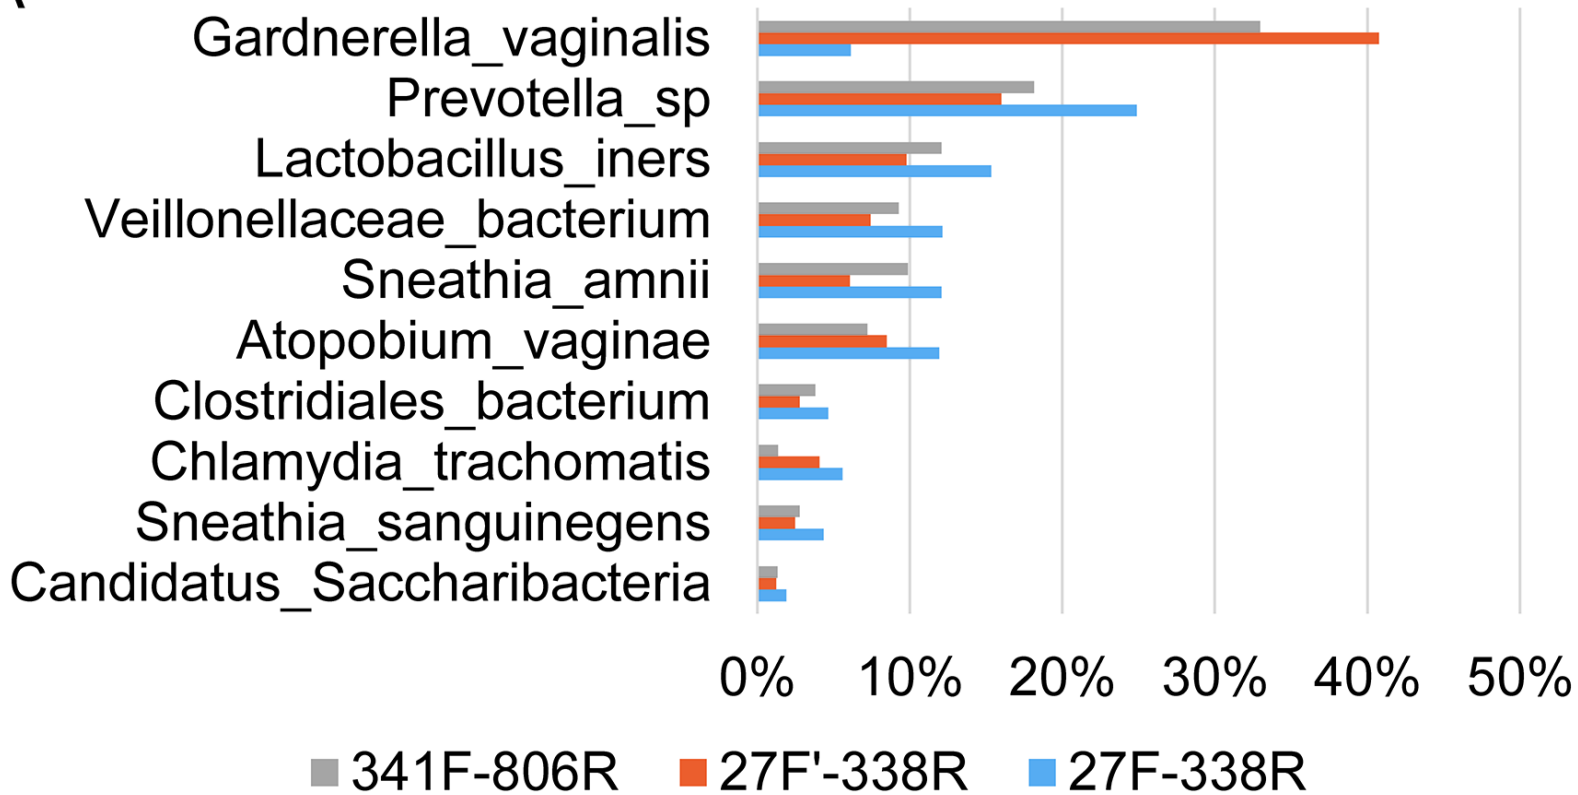

B

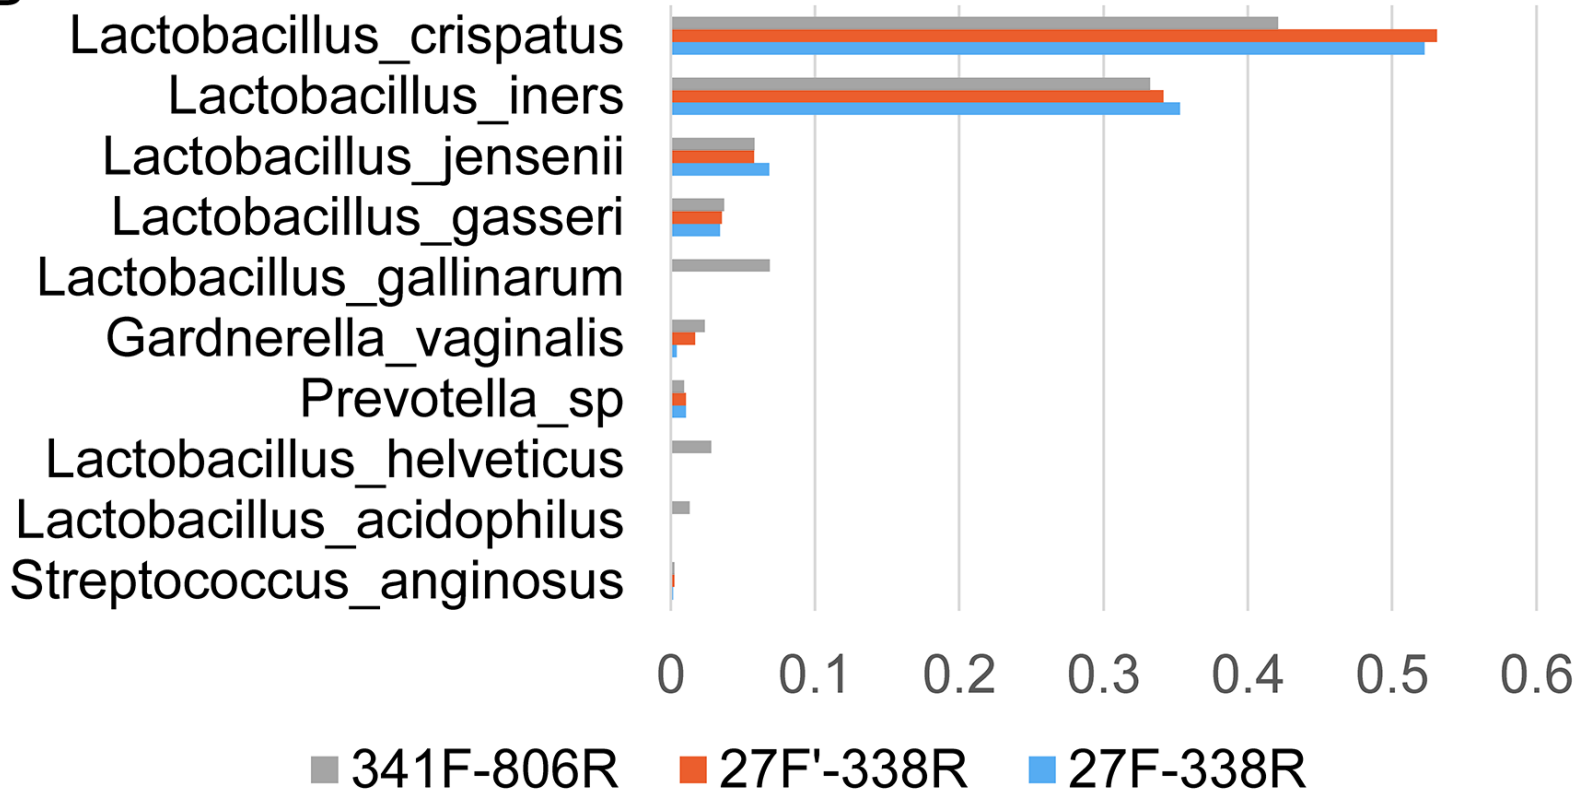

Source: https://biorxiv.org/content/biorxiv/early/2019/11/27/857052.full-text.pdf
